## **Title:**

# **Epithelium intrinsic vitamin A signaling co-ordinates pathogen clearance in the gut via IL-18**

Short title: Vitamin A-induced IL18 limits pathogen spread

## **Authors:**

Namrata Iyer<sup>1</sup>, Mayara Grizotte-Lake<sup>1</sup>, Sarah R. Gordon<sup>2</sup>, Ana C. S. Palmer<sup>1</sup>, Crystle Calvin<sup>1</sup>, Shipra Vaishnava<sup>1\*</sup>

## **Affiliations:**

<sup>1</sup>Department of Molecular Microbiology and Immunology, Brown University, Providence, RI, USA

<sup>2</sup>Department of Molecular Biology, Cell Biology and Biochemistry, Brown University, Providence, RI, USA

\* Correspondence to: Shipra Vaishnava ([shipra\\_vaishnava@brown.edu](mailto:shipra_vaishnava@brown.edu))

# Abstract

Intestinal epithelial cells (IECs) are at the forefront of host-pathogen interactions, coordinating a cascade of immune responses to confer protection against pathogens. Here we show that IEC-intrinsic vitamin A signaling restricts pathogen invasion early in the infection and subsequently activates immune cells to promote pathogen clearance. Mice blocked for retinoic acid receptor (RAR) signaling selectively in IECs ( $\text{stop}^{\Delta\text{IEC}}$ ) showed significantly higher *Salmonella* burden in colonic tissues early in the infection associated with higher luminal and systemic loads of the pathogen at later stages. Higher susceptibility of  $\text{stop}^{\Delta\text{IEC}}$  mice correlated with attenuated mucosal interferon gamma (IFN $\gamma$ ) production by underlying immune cells. We found that, at homeostasis, the intestinal epithelium of  $\text{stop}^{\Delta\text{IEC}}$  mice produced significantly lower amounts of interleukin 18 (IL-18), a potent inducer of IFN $\gamma$ . Regulation of IL-18 by vitamin A was also observed in a dietary model of vitamin A supplementation. IL-18 reconstitution in  $\text{stop}^{\Delta\text{IEC}}$  mice restored resistance to *Salmonella* by promoting epithelial cell shedding to eliminate infected cells and limit pathogen invasion early in infection. Further, IL-18 augmented IFN $\gamma$  production by underlying immune cells to restrict pathogen burden and systemic spread. Our work uncovers a critical role for vitamin A in coordinating a biphasic immune response to *Salmonella* infection by regulating IL-18 production by IECs.

# Author Summary

Epithelial cells line the intestinal lumen, forming a barrier between the body and dietary and microbial contents in the lumen. Apart from absorbing nutrients from diet, these epithelial cells help mediate a stable, symbiotic relationship between microbes in the gut and the immune cells. During infection, they help co-ordinate the immune response to counter the infection. How dietary micronutrients, such as vitamin A, inform epithelial cell function during infection is poorly understood. Using a model where epithelial cells in the gut cannot respond to vitamin A signals, we find that epithelial vitamin A signaling promotes resistance to *Salmonella* infection. We show that, vitamin A increases the production of a key cytokine, interleukin 18,

by epithelial cells. IL-18 promotes shedding of infected epithelial cells to reduce the pathogen invasion while also inducing the production of interferon gamma by immune cells to mediate pathogen clearance. Thus, epithelial cells dynamically respond to dietary vitamin A to regulate interleukin 18 production and potentiate resistance to infection.

## Introduction

Resistance to an invasive pathogen involves coordination between the early and late phase of the immune response so as to achieve pathogen clearance without excess collateral damage to the host. The intestinal epithelium is at the forefront of host-microbial interactions and is critical for orchestrating these immune responses during infection. Chemokines secreted by the epithelium are responsible for immune cell recruitment and activation [1]. T cells, NK cells as well as neutrophils are recruited to the colon during infection and secrete pro-inflammatory cytokines such as interferon gamma (IFN $\gamma$ ) to promote bacterial clearance and halt systemic spread of the infection [2, 3]. Moreover, the epithelium itself undergoes cell shedding in the early stages of infection as an innate defense mechanism to clear intracellular pathogens [4, 5]. Mechanisms that orchestrate such diverse functions of intestinal epithelial cells (IECs) during an infection remain poorly studied.

Vitamin A is an important dietary nutrient absorbed in the form of carotenoids and retinyl esters by intestinal epithelial cells and metabolized into its active form retinoic acid (RA). The heterodimeric nuclear receptor complex, retinoic acid receptor (RAR) and retinoid X receptor (RXR), is activated by RA binding to induce target gene expression [6]. Retinoic acid signaling is a potent regulator of gut immune make-up, affecting both the recruitment as well as activity of dendritic cells [7], T cells [8], B cells [9] and innate lymphoid cells (ILCs) [10] in the gut. The retinoic acid synthesized by epithelial cells, while available to underlying immune cells, is also capable of initiating a signaling response within IECs themselves. Retinoic acid signaling in intestinal epithelial cells (IECs) regulates epithelial lineage specification and promotes small intestinal T helper 17 (Th17) responses [11, 12]. Dietary vitamin A deficiency markedly

increases susceptibility to enteric pathogens [13], however, relatively little is known about the contribution of IEC-intrinsic retinoic acid signaling in the context of infection.

In this study we use a mouse model expressing IEC-specific dominant negative retinoic acid receptor ( $\text{stop}^{\Delta\text{IEC}}$ ) to investigate the role of retinoic acid signaling during infection.  $\text{stop}^{\Delta\text{IEC}}$  mice are more susceptible to luminal and systemic colonization by *Salmonella*. This is associated with abrogated shedding of infected epithelial cells as well as a blunted interferon gamma (IFN $\gamma$ ) response. We find that expression of interleukin-18, a known inducer of IFN $\gamma$ , is dependent on retinoic acid signaling in intestinal epithelial cells. RAR signaling-dependent IL-18 promotes epithelial cell shedding as well as mucosal IFN $\gamma$  production to orchestrate resistance to infection. Our results thus reveal a novel regulatory axis in the gut, wherein epithelial-intrinsic signaling in response to vitamin A, sequentially triggers IL-18 dependent mechanisms to first limit tissue invasion and then trigger an IFN $\gamma$  response to promote pathogen clearance.

## Results

### Epithelial-intrinsic RAR signaling is protective against *Salmonella* colonization

Vitamin A deficiency results in increased susceptibility to infection by *Salmonella* and other enteric pathogens [13, 14]. Vitamin A deficiency causes immune dysregulation in the gut, including improper lymphoid recruitment, maturation and functional potential [15, 16]. These sweeping changes obscure the finer details of how vitamin A regulates infection outcome. Dietary vitamin A is sequentially absorbed, metabolized and distributed by intestinal epithelial cells [17]. Retinoic acid synthesized by intestinal epithelial cells regulates immune cell recruitment and cytokine production [18, 19]. We therefore hypothesized that vitamin A signaling in IECs regulates the mucosal immune response to mediate infection susceptibility. To address this question, we chose a mouse model wherein vitamin A signaling was specifically abrogated in intestinal epithelial cells while metabolism of vitamin A was unchanged. This was done through the Villin-Cre dependent overexpression of a dominant

negative form of retinoic acid receptor alpha [20, 21], found to be the most dominant isoform expressed in intestinal epithelial cells (Fig 1A). Mice overexpressing this dominant negative RAR ( $\text{stop}^{\Delta\text{IEC}}$ ) were defective in the expression of the RA-responsive gene *isx* compared to their wild type littermates ( $\text{stop}^{\text{flox}}$ ) (Fig 1B and 1C) [22]. At homeostasis,  $\text{stop}^{\Delta\text{IEC}}$  mice displayed an increase in goblet cell differentiation as well as overall thickness of the mucus barrier (S1A and S1B Fig), corroborating the results of a study using  $\text{RAR}\alpha^{\Delta\text{IEC}}$  mice [11]. However,  $\text{stop}^{\Delta\text{IEC}}$  mice showed no significant differences in epithelial permeability or turnover (S1C and S1D Fig).

The role of epithelial-intrinsic vitamin A signaling during infection was assessed using a gastroenteritis infection model of non-typhoidal *Salmonella* Typhimurium (Fig 1D) [23]. Bacterial burden in the feces, colon and mesenteric lymph nodes was determined at early (18 hours post infection; hpi) and late (72 hpi) time points to assess if vitamin A signaling modulates the kinetics of the pathogen colonization. At early time points,  $\text{stop}^{\Delta\text{IEC}}$  mice and  $\text{stop}^{\text{flox}}$  littermate controls had similar luminal burdens of the pathogen. However,  $\text{stop}^{\Delta\text{IEC}}$  mice showed significantly higher loads of the bacterium within colon tissues (Fig 1E). This advantage in initial tissue invasion bolstered pathogen burdens at later time points, with higher loads found in the feces, colon as well as mesenteric lymph nodes of  $\text{stop}^{\Delta\text{IEC}}$  mice (Fig 1F). These results show that loss of RAR signaling in the intestinal epithelium phenocopies dietary vitamin A deficiency in the context of enteric infection. Further, the changes in infection kinetics suggest that epithelial-intrinsic vitamin A signaling co-ordinates early and late immune mechanisms to promote resistance to infection.

## **Epithelial-intrinsic RAR signaling promotes mucosal IFN $\gamma$ response during infection**

Vitamin A metabolism and signaling in the epithelium is a key determinant of the intestinal immune make up. In the gut, retinoic acid influences the balance between Th1 and Th17 cells, both of which are important for controlling infection [8, 24, 25]. IEC-intrinsic vitamin A

metabolism promotes mucosal IL-22 production, which in turn induces dysbiosis and aids pathogen colonization [18]. We therefore analyzed the colonic lamina propria populations in our mouse model to check if the increased susceptibility of  $\text{stop}^{\Delta\text{IEC}}$  mice is due to a dysregulated immune response. While  $\text{stop}^{\Delta\text{IEC}}$  and  $\text{stop}^{\text{flox}}$  mice showed similar colonic immune make-up at homeostasis (S2A-S2D Fig), on day 3 of *Salmonella* infection,  $\text{stop}^{\Delta\text{IEC}}$  mice displayed a defect in interferon gamma production (Fig 2A). CD4 and CD8 T cells were recruited to the colon to similar extents in  $\text{stop}^{\Delta\text{IEC}}$  and  $\text{stop}^{\text{flox}}$  mice, however activation of these cells to produce IFN $\gamma$  was defective in  $\text{stop}^{\Delta\text{IEC}}$  mice (Fig 2B-2D). No significant differences in mucosal IL-17 and IL-22 production were observed between  $\text{stop}^{\Delta\text{IEC}}$  and  $\text{stop}^{\text{flox}}$  mice during infection (S3A and S3B Fig).

Previous studies, both *in vitro* and *in vivo*, have shown that interferon gamma can be regulated by vitamin A, with retinoic acid promoting IFN $\gamma$  production in intestinal T cells [26, 27]. Interferon gamma plays an important role in resistance to *Salmonella* infection. IFN $\gamma$  knockout mice are more susceptible to *Salmonella*, both at intestinal and systemic level [28]. Mice with distinct microbiome compositions were found to be differentially susceptible to *Salmonella*; a function of the IFN $\gamma$  induction by these communities [2]. Mechanistically, IFN $\gamma$  promotes phagocytosis, oxidative/nitrosative response and cellular autophagy to clear the pathogen [29, 30]. To assess if the defect in IFN $\gamma$  production was responsible for the increased susceptibility in  $\text{stop}^{\Delta\text{IEC}}$  mice, we performed IFN $\gamma$  feedback experiments (Fig 2E). Reconstitution of IFN $\gamma$  in  $\text{stop}^{\Delta\text{IEC}}$  mice led to a rescue of susceptibility, with bacterial burdens returning to wild type levels (Fig 2F). These results suggest, that epithelial-intrinsic RAR signaling primes mucosal IFN $\gamma$  production to restrict *Salmonella* infection.

## Intestinal epithelium-intrinsic RAR signaling regulates interleukin-18

Interleukin-18 was first discovered as an interferon gamma inducing molecule [31, 32]. Upon transcription and translation, it is present within the cell as a precursor form (pro-IL18) which is proteolytically processed by caspases into its mature, secreted form [33]. This IL-1 family cytokine, unlike its close cousin IL1 $\beta$ , is constitutively expressed by a wide variety of cell types

in the body. In the gut, intestinal epithelial cells form the main source of IL-18 [34, 35]. IL-18 is microbially regulated. It accumulates in the intestine after microbial colonization and is responsive to microbial metabolites such as butyrate and taurine [36, 37]. Further, IL-18 is known to be up-regulated at the early stages of *Salmonella* infection [3]. A study with human neuroblastoma cells identified induction of IL-18 by all trans retinoic acid *in vitro* [38]. Further, serum IL-18 levels have been shown to increase during vitamin A supplementation in obese mice; an effect dependent on active vitamin A metabolism [39]. However, regulation of homeostatic IL-18 levels in the gut by vitamin A has not been previously reported. We hypothesized that interleukin-18 might be the mechanistic link between IEC-intrinsic RAR signaling and mucosal IFN $\gamma$  response.

We assessed the levels of IL-18 at homeostasis between stop <sup>$\Delta$ IEC</sup> and stop<sup>fllox</sup> mice. Colon whole tissue (Fig 3A) as well as colonocytes (Fig 3B) of stop <sup>$\Delta$ IEC</sup> mice showed reduction in the protein levels of the precursor form of IL-18. These results suggest that RAR signaling in intestinal epithelial cells promotes *il18* gene expression in the gut. In order to confirm that this phenomenon is not restricted to our stop <sup>$\Delta$ IEC</sup> mouse model, we confirmed the same in a dietary model where wild type mice were fed a diet spiked with retinyl acetate for 3 days. Compared to mice receiving vehicle control, mice fed excess retinyl acetate had increased levels of IL-18 in colonocytes (Fig 3C). These results suggest that dietary vitamin A can dynamically modulate the levels of IL-18 in the colon.

## **RAR signaling-dependent IL-18 orchestrates early resistance to *Salmonella* invasion**

Our results in stop <sup>$\Delta$ IEC</sup> mice demonstrated a direct correlation between intestinal IL-18 levels and resistance to *Salmonella* infection. In order to establish a causal relationship between IL-18 and infection outcome, we reconstituted IL-18 levels in stop <sup>$\Delta$ IEC</sup> mice and compared their susceptibility to stop<sup>fllox</sup> and stop <sup>$\Delta$ IEC</sup> mice at early time points (18 hpi) of *Salmonella* infection. We found that while IL-18 left luminal colonization unaffected, IL-18 feedback in stop <sup>$\Delta$ IEC</sup> mice

completely rescued tissue burdens of the pathogen to levels lower than wild type (Fig 4A-4C). This was further confirmed using confocal microscopy where staining for *Salmonella* revealed significantly higher levels of bacteria within stop<sup>ΔIEC</sup> colonic tissues compared to stop<sup>flox</sup> and IL-18 feedback mice (Fig 4D-4F; S1-S3 Movies). Feedback with IFN $\gamma$ , however, failed to rescue early tissue invasion in stop<sup>ΔIEC</sup> mice (Fig 4A-4C). This suggests that epithelial RAR signaling promotes early resistance to bacterial invasion in an IL-18 dependent, but IFN $\gamma$  independent, manner.

The epithelium is the first point of contact with adherent and invasive pathogens. Early in the infection, *Salmonella* uses epithelial invasion as a strategy to induce tissue inflammation, which endows it a selective advantage over gut commensals [40, 41]. Restricting this invasion is important to limit luminal expansion and systemic spread of the pathogen. Recently, epithelial cell death has been identified as a strategy to eliminate infected cells in the gut and limit tissue colonization. While cell shedding routinely occurs as a part of epithelial turnover, the rate of shedding increases dramatically during pathological insult to the epithelium [42, 43]. In the context of infection, inflammasome-mediated cell death pathways have been implicated in this epithelial-intrinsic response [4, 44]. The activation of these cell death pathways is associated with IL-18 cleavage and secretion [42]. We hypothesized that RAR signaling in IECs modulates cell death response during *Salmonella* infection via IL-18. Cell death has been reported to occur as an early response to the infection, especially in the cecum which is more permissive to bacterial invasion [4]. We, therefore, assessed the extent of cecal epithelial cell shedding in stop<sup>ΔIEC</sup> mice at 18 hpi using cleaved caspase-3 staining as a marker for dying epithelial cells. We observed significantly higher numbers of dying cells in stop<sup>flox</sup> mice compared to stop<sup>ΔIEC</sup> mice. This defect was rescued completely upon IL-18 reconstitution (Fig 4G-4J). This suggests that RAR signaling mediated IL-18 production promotes an epithelial cell shedding response which is associated with restricted tissue invasion by *Salmonella*.



# **Intestinal epithelium-intrinsic RAR signaling regulates pathogen colonization via interleukin-18**

Our results with IFN $\gamma$  feedback showed that at day 3 of infection, IFN $\gamma$  is successfully able to rescue pathogen colonization in stop $\Delta^{IEC}$  mice (Fig 2F). IL-18, but not IFN $\gamma$ , feedback was required to rescue early tissue invasion susceptibility in stop $\Delta^{IEC}$  mice (Fig 4C). Therefore, we hypothesized that IL-18 levels in the gut promoted early innate defenses to infection, while priming mucosal IFN $\gamma$  to mediate pathogen clearance in the later stages. To evaluate this, we analyzed the effect of IL-18 reconstitution in stop $\Delta^{IEC}$  mice on day 3 of infection (Fig 5A). Feedback of IL-18 was sufficient to bring down bacterial loads in fecal, MLN as well as colon samples of stop $\Delta^{IEC}$  mice back to wild type levels (Fig 5B and 5C). Assessment of the colonic lamina propria revealed that this feedback effectively rescued IFN $\gamma$  production by mucosal T cells (Fig 5D and 5E). These results suggest that epithelial RAR signaling modulates the mucosal IFN $\gamma$  response via IL-18 to mediate resistance to pathogen. These results align with a study where epithelial IL-18 expression, regulated by histone deacetylase 3 activity, primes IFN $\gamma$  response in intraepithelial lymphocytes to restrict colonization by *Citrobacter* [45]. IL-18 induction by protozoan colonization in the gut exerts a similar protective effects against *Salmonella* by promoting mucosal Th1 and Th17 response [46]. Our results corroborate the importance of IL-18 as a determinant of infection susceptibility and reveal a previously unappreciated pathway for IL-18 regulation via vitamin A signaling and dietary vitamin A.

## **Discussion**

Vitamin A is a potent dietary micronutrient and vitamin A deficiency causes susceptibility to a spectrum of infectious diseases, especially in developing countries. A large body of work has contributed to our understanding of the immunomodulatory potential of vitamin A and its metabolite retinoic acid. However, pleiotropic cellular effects, complex metabolic and distribution pathways as well as source- and concentration- dependent functional effects have made dietary vitamin A models of infection difficult to interpret [47]. In this study, we employ a

tissue-specific signaling abrogation model to elucidate the specific role of the vitamin A signaling pathway in the intestinal epithelium during infection. A key feature of this model is the absence of interference with the vitamin A metabolic machinery, avoiding any differences in gut immune trafficking mediated by epithelium-derived RA. Specifically, this study extends our understanding of homeostatic functions of vitamin A signaling in the intestine and reveals a previously unappreciated regulatory role for this pathway during *Salmonella* infection in the gut. In addition to describing the dynamic regulation of homeostatic IL-18 levels in the gut by vitamin A, we elucidate the functional role of the vitamin A-IL18 axis in restricting early tissue invasion by *Salmonella* and priming mucosal IFN $\gamma$  production to mediate pathogen clearance (Fig 6).

Cytokines secreted by epithelial cells are important for immune co-ordination in the gut. Vitamin A is known to induce the signaling of important cytokines such as IL-22 in the gut [26]. A previous study from our group has shown that epithelial-intrinsic retinoic acid synthesis promotes IL-22 expression in underlying immune cells which in turn promotes *Salmonella* induced dysbiosis and gut colonization [18]. In contrast, the current study shows that epithelial-intrinsic RA signaling regulates IL-18 expression which protects against pathogen colonization and systemic spread. This highlights that retinoic acid synthesized by epithelial cells has distinct autocrine and paracrine functions, each having differential effects on infection outcome.

Interleukin-18 is set apart from other members of the IL1 family by being constitutively expressed by wide range of cell types throughout the body [48]. While both IL1 $\beta$  and IL-18 have pro-inflammatory functions, the classic fever response associated with IL1 $\beta$  is absent with IL-18. TLR ligands (LPS, poly (I:C), pam3CSK4) and type I interferons induce expression of IL-18, which is then proteolytically processed via the inflammasome pathway [49]. While induction of IL-18 during inflammatory conditions is well documented, relatively little is known about homeostatic regulators of IL-18. Studies have shown that late in gestation, inactive IL-18 starts accumulating in the intestine and active IL-18 is detectable postnatally [50]. Microbial

colonization of the gut induces an upregulation in IL-18 expression [37] and the microbial metabolite butyrate is implicated in transcriptional regulation of IL-18 [36]. This study is the first to demonstrate that homeostatic IL-18 levels in the gut are regulated by IEC-intrinsic vitamin A signaling. Further, we show that vitamin A supplementation in the diet is also capable of inducing IL-18 in the gut, suggesting a dynamic regulation of epithelial IL-18 levels by dietary vitamin A.

Although our results clearly demonstrate that IL-18 levels in the gut are regulated by vitamin A, the exact mechanism of this regulation remains unresolved. Studies mining transcriptional targets of RAR signaling by *in silico* and ChIP-seq techniques have not identified IL-18 as a candidate, suggesting that retinoic acid receptor does not directly bind the *il18* promoter to induce its expression [51, 52]. IL-18 expression is regulated by a host of transcription factors such as NF- $\kappa$ B, PU.1, Stat1, AP-1 and Bcl6 [49, 53, 54]. Both Stat1 and Bcl6 are reported to be regulated by retinoic acid [55-57]. Further, a post-transcriptional regulators of IL-18, Bruton's tyrosine kinase, also has a predicted RAR binding site [58, 59]. We hypothesize that vitamin A regulation of IL-18 occurs by an indirect mechanism involving an interplay between one or more direct targets of RAR signaling. Uncovering the mechanistic link between vitamin A and IL-18 will be the focus of future investigations.

IL-18 and IFN $\gamma$  are implicated in a host of gastrointestinal and systemic infections caused *Toxoplasmas gondii* [60], *C. rodentium* [45], *Listeria monocytogenes* [61, 62] among others. These pathogens represent a diversity of adhesion/invasion strategies as well as potential for systemic spread and toxicity. It remains to be seen how epithelial-intrinsic vitamin A signaling and IL-18 modulate infection outcome in these contexts.

## Materials and Methods

### Mice

All mice were bred in the SPF barrier facility at Brown University. Wild type stop<sup>flox</sup> mice were a kind gift from Dr. S. Sockanathan (Johns Hopkins University School of Medicine). Villin-Cre

mice in a C56BL/6J background were purchased from Jackson Laboratories. stop<sup>flox</sup> mice were bred to Villin-Cre mice to get stop<sup>flox</sup> (Cre negative) or stop<sup>ΔIEC</sup> (Cre positive) mice. All mice used in the study were 6-10 weeks old and were gender-matched across different groups. Littermates or co-housed mice were used to minimize microbiome mediated effects on the study.

## **Bacterial strains and maintenance**

All infection experiments were carried out using *Salmonella* Typhimurium SL1344 GFP strain (kind gift of Dr. Vanessa Sperandio, UT Southwestern). Strain was routinely maintained on Luria Bertani agar plates containing 100 µg/ml ampicillin.

## **Mouse infections**

For a gastroenteritis model of *Salmonella* infection protocol outlined by Barthel et al. was followed [23]. Briefly, mice were deprived of food and water for 4 hours and then orally gavaged with 20 mg streptomycin. After 20 hours, mice were again deprived of food and water for 4 hours. Overnight culture of *Salmonella* was subcultured for 4 hours, following which mice were infected with 10<sup>8</sup> bacteria by oral gavage. Mice were sacrificed 72 hours post infection to harvest organs and assess bacterial burden. For bacterial burden in distal colon, tissues were harvested, fileted and washed twice in phosphate-buffered saline (PBS). Tissues were then incubated in PBS containing 400 µg/ml gentamicin for 30 min at room temperature with shaking. Tissues were then rinsed with PBS, weighed, homogenized and plated to determine bacterial burden.

In order to assess the infection at early time points, protocol outlined by Sellin et al was followed [4]. The streptomycin treatment and *Salmonella* subculture was done as described above and mice were infected with 5x10<sup>7</sup> bacteria by oral gavage. Assessment of cell death as well as tissue burden were performed in the cecum and proximal colon respectively which are the primary sites infected at this early time point. For cell death assessment, cecal tissues were harvested and fixed in 4% paraformaldehyde/4% sucrose overnight. Fixed tissues were

then saturated in PBS containing 20% sucrose, embedded in optimal cutting temperature (OCT) medium, frozen over dry ice and stored at -80°C. Proximal colon tissues were washed and gentamycin-treated for assessment of bacterial burden.

For reconstitution experiments, mouse recombinant IFN $\gamma$  (Sino Biological; Cat. #50709-MNAH) and mouse recombinant IL-18 (Sino Biological; Cat. # 50073-MNCE) were used. Since IFN $\gamma$  production defect in stop <sup>$\Delta$ IEC</sup> mice was observed only after infection, reconstitution was performed 0 hr and 48hr post infection with 10  $\mu$ g recombinant IFN $\gamma$  intraperitoneally. Since stop <sup>$\Delta$ IEC</sup> mice had homeostatic deficiency in IL-18 production, they were reconstituted with 2.5  $\mu$ g recombinant IL-18 intraperitoneally 24 hours before and 24 hours after infection. For the early time point experiments, stop <sup>$\Delta$ IEC</sup> mice received a single dose of 5  $\mu$ g recombinant IL-18 intraperitoneally 24 hours before infection or a single dose of 15  $\mu$ g recombinant IFN $\gamma$  intraperitoneally 0 hours post infection.

### **Colonic lamina propria lymphocyte isolation and analysis**

Colonic lamina propria lymphocytes were isolated as described by Kim et al [63]. Briefly, colons were flushed to remove luminal content, fileted, cut into three pieces and stored in ice-cold PBS. Tissues were washed by vigorous shaking, followed by sequential 10 min digestions at 37°C in HBSS containing 3% FCS, 1mM dithiothreitol and 30mM ethylene diamine tetraacetic acid (EDTA) and HBSS containing 3% FCS and 30mM EDTA. Tissues were vigorously shaken between treatments to dislodge epithelial cells. Lymphocytes were liberated from the lamina propria by digesting tissues in RPMI complete containing 40  $\mu$ l/ml collagenase (Sigma- Aldrich, stock solution 5 mg/ml) and 5  $\mu$ l/ml DNase (Sigma- Aldrich, stock solution 0.5 mg/ml) for one hour at 37°C followed by vigorous shaking. Cells were strained through a 70  $\mu$ m filter and separated on a discontinuous 40%/80% Percoll (GE Healthcare) gradient. Cells at the interface were harvested and processed for flow cytometry analysis.

### **Flow cytometry analysis**

Cells were stimulated for 4 hours at 37°C in RPMI complete containing 1X cell stimulation cocktail (eBioscience) and protein transport inhibitor cocktail (eBioscience). Stimulated cells were harvested and stained for surface markers and viability for 30 min at room temperature. Samples were stained with viability dye APCef780 (ThermoFisher), CD45 evolve655 (ThermoFisher), CD4 BV785 (BioLegend), CD3 eF450 (ThermoFisher), CD8a BV605 (BioLegend). Following overnight fixation using the Fixation/Permeabilization solution (eBioscience Foxp3 Staining Buffer Set), cells were permeabilized and stained for cytokines IL-17A AF488 (eBioscience), IL-22 PE (eBioscience) and IFN $\gamma$  PE (eBioscience). Cells were analyzed using the Aria IIIu cytometer and data was analyzed using the FlowJo software.

### Laser capture microdissection and quantitative real time PCR

Intestinal tissues were flushed with PBS and OCT, embedded in OCT, frozen on dry ice and stored at -80°C. Cryosections (10  $\mu$ m thick) were stained with methyl green and eosin. Intestinal epithelial cells were selectively captured using the Arcturus Laser capture Microdissection system. RNA was isolated from IECs using the RNAqueous-Micro Total RNA kit (Ambion) and converted into cDNA using the iScript cDNA synthesis kit (BioRad). Whole tissue samples were homogenized, RNA was extracted using the PureLink RNA isolation kit (Life Technologies) and converted to cDNA using MMLV reverse transcriptase. Quantitative real time PCR was carried out using SYBR green master mix (Maxima). Expression was normalized using *gapdh* as a housekeeping gene. Details of primers are provided in Table 1.

**Table 1. Primers used in this study**

| Primers              |                                  |
|----------------------|----------------------------------|
| <i>Gapdh</i> forward | 5' AACTTTGGCATTGTGGAAGG 3'       |
| <i>Gapdh</i> reverse | 5' ACACATTGGGGGTAGGAACA 3'       |
| <i>Rara</i> forward  | 5' GAAAAAGAAGAAAGAGGCACCCAAGC 3' |
| <i>Rara</i> reverse  | 5' AGGTCAATGTCCAGGGAGACTCGTTG 3' |
| <i>Rarb</i> forward  | 5' AATGCTGGCTTCGGTCCTCTGACT 3'   |
| <i>Rarb</i> reverse  | 5'GCTTGCTGGGTCGTCGTTTTCTAATG 3'  |
| <i>Rarg</i> forward  | 5' ATGGATGACACCGAGACTGGGCTACT 3' |

|                     |                                  |
|---------------------|----------------------------------|
| <i>Rarg</i> reverse | 5' CCTTTCTGCTCCCTTAGTGCTGATGC 3' |
| <i>Rxra</i> forward | 5' AGAATCTTCTCTACAGGCATGTCC 3'   |
| <i>Rxra</i> reverse | 5' CTATGGGGTATACAGTTGTGAGGG 3'   |
| <i>Rxrb</i> forward | 5'CGTGATAACAAAGACTGTACAGTGG 3'   |
| <i>Rxrb</i> reverse | 5'GATGTTAGTCACTGGGTCATTTGG 3'    |
| <i>Rxrg</i> forward | 5'AAAGATCTCATCTACACCTGTCCG 3'    |
| <i>rxrg</i> reverse | 5' GAGGGTGAAAAGTTGCTTATCTGC 3'   |
| <i>Il18</i> forward | 5' GCCTCAAACCTTCCAAATCA 3'       |
| <i>Il18</i> reverse | 5' TGGATCCATTTCTCAAAGG 3'        |
| <i>Isx</i> forward  | 5' TTCCAATTACCCATTACCC 3'        |
| <i>Isx</i> reverse  | 5' CTCTTCTCCTGCTTCCTCCA 3'       |

334

## 335 **Barrier function analysis**

336 BrdU incorporation assay was used for assessment of barrier turnover. Mice were injected  
337 intraperitoneally with 1 mg of bromodeoxyuridine. Mice were sacrificed 2 hours and 24 hours  
338 post injection, distal colon tissues were fixed in methacarn fixative and embedded in paraffin  
339 blocks. Tissue sections (7 µm thick) were stained with anti-BrdU antibody (Novus Biologicals;  
340 #NBP2-14890) and visualized. For mucus staining, colon tissues samples were fixed in  
341 methacarn and embedded in paraffin blocks. Tissue sections (7 µm thick) were stained with  
342 alcian blue-periodic acid Schiff's reagent to analyze mucus thickness and goblet cell numbers  
343 in the crypt.

## 344 **Immunofluorescence staining and confocal microscopy**

345 For visualization of cell shedding and intracellular bacterial loads, PFA-fixed, OCT-embedded  
346 samples of cecum and proximal colon were cryosectioned to 10 µm thickness. Sections were  
347 air dried, permeabilized with 0.5% Triton X-100 and blocked with 10% donor goat serum.  
348 Sections were stained with anti-Salmonella LPS (Difco; #DF2659-47-5 ), anti-Cleaved  
349 Caspase-3 (Cell Signaling; #9661S) and anti-Epcam (BioLegend; #118201) antibody. DAPI  
350 was used to counterstain nuclei. Tissues were visualized using the Olympus FV3000  
351 microscope.



## Western Blot

For analysis of protein levels specifically in intestinal epithelial cells, colons were harvested and flushed with PBS. The colon epithelial cells were lysed in situ with tissue protein extraction reagent (TPER, Thermo Fisher) containing protease inhibitor cocktail. After 5 min incubation, lysate was recovered, centrifuged at 10,000 g for 3 min to remove debris and stored at -80°C [64]. Whole tissue lysates were obtained by homogenizing tissue samples in 500 µl of TPER containing protease inhibitors and incubating on ice for 20 min. Lysates were centrifuged as above and stored at -80°C. Protein in the samples were quantified using the DC protein assay (BioRad) and approximately 50 µg of protein was loaded for SDS-PAGE. Prestained protein ladder (BioRad) was loaded as a reference. Proteins were transferred on to PVDF membranes and blocked with 4% bovine serum albumin in TBST buffer for one hour. Blots were stained overnight at 4°C using primary antibodies against IL-18 (Abcam; #ab71495) followed by incubation with appropriate secondary HRP-conjugated antibodies. Beta-actin (Santa Cruz; #sc-47778-HRP) levels in the sample were used for normalization. Blots were analyzed using ImageJ software to calculate relative protein levels.

## Dietary intervention

6-8 weeks old stop<sup>flox</sup> mice were fed regular mouse chow coated with retinyl acetate (500 IU/g) or equivalent amount of vehicle control (corn oil) for 3 days. Chow intake was monitored to ensure both groups of mice consumed similar amounts. Mice were sacrificed and colon lysates were prepared to analyze IL-18 levels using western blot.

## Microscope image acquisition

Image acquisition was performed on the Olympus FV3000 confocal microscope. Images were acquired using a 60X oil immersion lens. For intracellular bacterial data, images were acquired as a Z-stack. All images processing was performed using the Fiji software with an Olympus plugin. Channel color for DAPI was changed to greyscale post-processing. Original 16-bit stacks were converted into RGB format before exporting as a video.



## Statistical analysis

Data shown represent means  $\pm$  SEM. Data was plotted and analyzed using GraphPad Prism software. For comparison of two groups, Student's t test was employed. Comparison of two or more groups was performed using One-way ANOVA. Two-way ANOVA was used to compare gene expression across multiple groups.

## Ethics statement

All experiments were approved by and carried out in accordance with the guidelines of the Institutional Animal Care and Use Committee at Brown University (Protocol # 1803000345).

## Acknowledgments

We thank Kevin Carlson for assistance with flow cytometry and Geoff Williams for maintaining the Leduc Bioimaging facility.

## References

1. Allaire JM, Crowley SM, Law HT, Chang SY, Ko HJ, Vallance BA. The Intestinal Epithelium: Central Coordinator of Mucosal Immunity. *Trends Immunol.* 2018;39(9):677-96. doi: 10.1016/j.it.2018.04.002. PubMed PMID: 29716793.
2. Thiemann S, Smit N, Roy U, Lesker TR, Galvez EJC, Helmecke J, et al. Enhancement of IFN $\gamma$  Production by Distinct Commensals Ameliorates Salmonella-Induced Disease. *Cell Host Microbe.* 2017;21(6):682-94 e5. doi: 10.1016/j.chom.2017.05.005. PubMed PMID: 28618267.
3. Muller AA, Dolowschiak T, Sellin ME, Felmy B, Verbree C, Gadiant S, et al. An NK Cell Perforin Response Elicited via IL-18 Controls Mucosal Inflammation Kinetics during Salmonella Gut Infection. *PLoS Pathog.* 2016;12(6):e1005723. doi: 10.1371/journal.ppat.1005723. PubMed PMID: 27341123; PubMed Central PMCID: PMC4920399.
4. Sellin ME, Muller AA, Felmy B, Dolowschiak T, Diard M, Tardivel A, et al. Epithelium-intrinsic NAIP/NLRC4 inflammasome drives infected enterocyte expulsion to restrict Salmonella replication in the intestinal mucosa. *Cell Host Microbe.* 2014;16(2):237-48. doi: 10.1016/j.chom.2014.07.001. PubMed PMID: 25121751.
5. Liu J, Bolick DT, Kolling GL, Fu Z, Guerrant RL. Protein Malnutrition Impairs Intestinal Epithelial Cell Turnover, a Potential Mechanism of Increased Cryptosporidiosis in a Murine Model. *Infect Immun.* 2016;84(12):3542-9. doi: 10.1128/IAI.00705-16. PubMed PMID: 27736783; PubMed Central PMCID: PMC45116730.
6. Harrison EH. Mechanisms involved in the intestinal absorption of dietary vitamin A and provitamin A carotenoids. *Biochim Biophys Acta.* 2012;1821(1):70-7. doi: 10.1016/j.bbalip.2011.06.002. PubMed PMID: 21718801; PubMed Central PMCID: PMC3525326.
7. Coombes JL, Siddiqui KR, Arancibia-Carcamo CV, Hall J, Sun CM, Belkaid Y, et al. A functionally specialized population of mucosal CD103 $^{+}$  DCs induces Foxp3 $^{+}$  regulatory T cells via a TGF- $\beta$  and

- retinoic acid-dependent mechanism. *J Exp Med.* 2007;204(8):1757-64. doi: 10.1084/jem.20070590. PubMed PMID: 17620361; PubMed Central PMCID: PMC2118683.
8. Hall JA, Cannons JL, Grainger JR, Dos Santos LM, Hand TW, Naik S, et al. Essential role for retinoic acid in the promotion of CD4(+) T cell effector responses via retinoic acid receptor alpha. *Immunity.* 2011;34(3):435-47. doi: 10.1016/j.immuni.2011.03.003. PubMed PMID: 21419664; PubMed Central PMCID: PMC263415227.
9. Mora JR, von Andrian UH. Role of retinoic acid in the imprinting of gut-homing IgA-secreting cells. *Semin Immunol.* 2009;21(1):28-35. doi: 10.1016/j.smim.2008.08.002. PubMed PMID: 18804386; PubMed Central PMCID: PMC2663412.
10. Goverse G, Labao-Almeida C, Ferreira M, Molenaar R, Wahlen S, Konijn T, et al. Vitamin A Controls the Presence of RORgamma+ Innate Lymphoid Cells and Lymphoid Tissue in the Small Intestine. *J Immunol.* 2016;196(12):5148-55. doi: 10.4049/jimmunol.1501106. PubMed PMID: 27183576.
11. Jijon HB, Suarez-Lopez L, Diaz OE, Das S, De Calisto J, Parada-Kusz M, et al. Correction: Intestinal epithelial cell-specific RARalpha depletion results in aberrant epithelial cell homeostasis and underdeveloped immune system. *Mucosal Immunol.* 2019;12(2):580. doi: 10.1038/s41385-018-0074-8. PubMed PMID: 30514887.
12. Gattu S, Bang YJ, Pendse M, Dende C, Chara AL, Harris TA, et al. Epithelial retinoic acid receptor beta regulates serum amyloid A expression and vitamin A-dependent intestinal immunity. *Proc Natl Acad Sci U S A.* 2019. doi: 10.1073/pnas.1812069116. PubMed PMID: 31097581.
13. McClung L, Winters J. Effect of Vitamin A-Free Diet on Resistance to Infection by Salmonella enteritidis. *The Journal of Infectious Diseases.* 1932;51(3):469-74
14. Imdad A, Mayo-Wilson E, Herzer K, Bhutta ZA. Vitamin A supplementation for preventing morbidity and mortality in children from six months to five years of age. *Cochrane Database Syst Rev.* 2017;3:CD008524. doi: 10.1002/14651858.CD008524.pub3. PubMed PMID: 28282701; PubMed Central PMCID: PMC6464706.
15. Huang Z, Liu Y, Qi G, Brand D, Zheng SG. Role of Vitamin A in the Immune System. *J Clin Med.* 2018;7(9). doi: 10.3390/jcm7090258. PubMed PMID: 30200565; PubMed Central PMCID: PMC6162863.
16. Villamor E, Fawzi WW. Effects of vitamin a supplementation on immune responses and correlation with clinical outcomes. *Clin Microbiol Rev.* 2005;18(3):446-64. doi: 10.1128/CMR.18.3.446-464.2005. PubMed PMID: 16020684; PubMed Central PMCID: PMC1195969.
17. Das BC, Thapa P, Karki R, Das S, Mahapatra S, Liu TC, et al. Retinoic acid signaling pathways in development and diseases. *Bioorg Med Chem.* 2014;22(2):673-83. doi: 10.1016/j.bmc.2013.11.025. PubMed PMID: 24393720; PubMed Central PMCID: PMC4447240.
18. Grizotte-Lake M, Zhong G, Duncan K, Kirkwood J, Iyer N, Smolenski I, et al. Commensals Suppress Intestinal Epithelial Cell Retinoic Acid Synthesis to Regulate Interleukin-22 Activity and Prevent Microbial Dysbiosis. *Immunity.* 2018;49(6):1103-15 e6. doi: 10.1016/j.immuni.2018.11.018. PubMed PMID: 30566883; PubMed Central PMCID: PMC6319961.
19. Iliev ID, Mileti E, Matteoli G, Chieppa M, Rescigno M. Intestinal epithelial cells promote colitis-protective regulatory T-cell differentiation through dendritic cell conditioning. *Mucosal Immunol.* 2009;2(4):340-50. doi: 10.1038/mi.2009.13. PubMed PMID: 19387433.
20. Rajaii F, Bitzer ZT, Xu Q, Sockanathan S. Expression of the dominant negative retinoid receptor, RAR403, alters telencephalic progenitor proliferation, survival, and cell fate specification. *Dev Biol.* 2008;316(2):371-82. doi: 10.1016/j.ydbio.2008.01.041. PubMed PMID: 18329011.
21. Tsai S, Bartelmez S, Heyman R, Damm K, Evans R, Collins SJ. A mutated retinoic acid receptor-alpha exhibiting dominant-negative activity alters the lineage development of a multipotent hematopoietic cell line. *Genes Dev.* 1992;6(12A):2258-69. PubMed PMID: 1334022.
22. Lobo GP, Hessel S, Eichinger A, Noy N, Moise AR, Wyss A, et al. ISX is a retinoic acid-sensitive gatekeeper that controls intestinal beta, beta-carotene absorption and vitamin A production. *FASEB J.*

2010;24(6):1656-66. doi: 10.1096/fj.09-150995. PubMed PMID: 20061533; PubMed Central PMCID: PMCPMC2874479.

23. Barthel M, Hapfelmeier S, Quintanilla-Martinez L, Kremer M, Rohde M, Hogardt M, et al. Pretreatment of mice with streptomycin provides a *Salmonella enterica* serovar Typhimurium colitis model that allows analysis of both pathogen and host. *Infect Immun*. 2003;71(5):2839-58. PubMed PMID: 12704158; PubMed Central PMCID: PMCPMC153285.

24. Iwata M, Eshima Y, Kagechika H. Retinoic acids exert direct effects on T cells to suppress Th1 development and enhance Th2 development via retinoic acid receptors. *Int Immunol*. 2003;15(8):1017-25. PubMed PMID: 12882839.

25. Brown CC, Esterhazy D, Sarde A, London M, Pullabhatla V, Osma-Garcia I, et al. Retinoic acid is essential for Th1 cell lineage stability and prevents transition to a Th17 cell program. *Immunity*. 2015;42(3):499-511. doi: 10.1016/j.immuni.2015.02.003. PubMed PMID: 25769610; PubMed Central PMCID: PMCPMC4372260.

26. Mielke LA, Jones SA, Raverdeau M, Higgs R, Stefanska A, Groom JR, et al. Retinoic acid expression associates with enhanced IL-22 production by gamma delta T cells and innate lymphoid cells and attenuation of intestinal inflammation. *J Exp Med*. 2013;210(6):1117-24. doi: 10.1084/jem.20121588. PubMed PMID: 23690441; PubMed Central PMCID: PMCPMC3674702.

27. Rampal R, Awasthi A, Ahuja V. Retinoic acid-primed human dendritic cells inhibit Th9 cells and induce Th1/Th17 cell differentiation. *J Leukoc Biol*. 2016;100(1):111-20. doi: 10.1189/jlb.3VMA1015-476R. PubMed PMID: 26980802.

28. Bao S, Beagley KW, France MP, Shen J, Husband AJ. Interferon-gamma plays a critical role in intestinal immunity against *Salmonella typhimurium* infection. *Immunology*. 2000;99(3):464-72. PubMed PMID: 10712678; PubMed Central PMCID: PMCPMC2327174.

29. Kak G, Raza M, Tiwari BK. Interferon-gamma (IFN-gamma): Exploring its implications in infectious diseases. *Biomol Concepts*. 2018;9(1):64-79. doi: 10.1515/bmc-2018-0007. PubMed PMID: 29856726.

30. Gordon MA, Jack DL, Dockrell DH, Lee ME, Read RC. Gamma interferon enhances internalization and early nonoxidative killing of *Salmonella enterica* serovar Typhimurium by human macrophages and modifies cytokine responses. *Infect Immun*. 2005;73(6):3445-52. doi: 10.1128/IAI.73.6.3445-3452.2005. PubMed PMID: 15908373; PubMed Central PMCID: PMCPMC1111838.

31. Dinarello CA, Novick D, Kim S, Kaplanski G. Interleukin-18 and IL-18 binding protein. *Front Immunol*. 2013;4:289. doi: 10.3389/fimmu.2013.00289. PubMed PMID: 24115947; PubMed Central PMCID: PMCPMC3792554.

32. Yoshimoto T, Takeda K, Tanaka T, Ohkusu K, Kashiwamura S, Okamura H, et al. IL-12 up-regulates IL-18 receptor expression on T cells, Th1 cells, and B cells: synergism with IL-18 for IFN-gamma production. *J Immunol*. 1998;161(7):3400-7. PubMed PMID: 9759857.

33. Ghayur T, Banerjee S, Hugunin M, Butler D, Herzog L, Carter A, et al. Caspase-1 processes IFN-gamma-inducing factor and regulates LPS-induced IFN-gamma production. *Nature*. 1997;386(6625):619-23. doi: 10.1038/386619a0. PubMed PMID: 9121587.

34. Kolinska J, Lisa V, Clark JA, Kozakova H, Zakostelecka M, Khailova L, et al. Constitutive expression of IL-18 and IL-18R in differentiated IEC-6 cells: effect of TNF-alpha and IFN-gamma treatment. *J Interferon Cytokine Res*. 2008;28(5):287-96. doi: 10.1089/jir.2006.0130. PubMed PMID: 18547159.

35. Pizarro TT, Michie MH, Bentz M, Woraratanadham J, Smith MF, Jr., Foley E, et al. IL-18, a novel immunoregulatory cytokine, is up-regulated in Crohn's disease: expression and localization in intestinal mucosal cells. *J Immunol*. 1999;162(11):6829-35. PubMed PMID: 10352304.

36. Kalina U, Koyama N, Hosoda T, Nuernberger H, Sato K, Hoelzer D, et al. Enhanced production of IL-18 in butyrate-treated intestinal epithelium by stimulation of the proximal promoter region. *Eur J Immunol*. 2002;32(9):2635-43. doi: 10.1002/1521-4141(200209)32:9<2635::AID-IMMU2635>3.0.CO;2-N. PubMed PMID: 12207348.

37. Levy M, Thaïss CA, Zeevi D, Dohnalova L, Zilberman-Schapira G, Mahdi JA, et al. Microbiota-Modulated Metabolites Shape the Intestinal Microenvironment by Regulating NLRP6 Inflammasome Signaling. *Cell*. 2015;163(6):1428-43. doi: 10.1016/j.cell.2015.10.048. PubMed PMID: 26638072.
38. Sallmon H, Hoene V, Weber SC, Dame C. Differentiation of human SH-SY5Y neuroblastoma cells by all-trans retinoic acid activates the interleukin-18 system. *J Interferon Cytokine Res*. 2010;30(2):55-8. doi: 10.1089/jir.2009.0036. PubMed PMID: 20028206.
39. Gushchina LV, Yasmeen R, Ziouzenkova O. Moderate vitamin A supplementation in obese mice regulates tissue factor and cytokine production in a sex-specific manner. *Arch Biochem Biophys*. 2013;539(2):239-47. doi: 10.1016/j.abb.2013.06.020. PubMed PMID: 23850584; PubMed Central PMCID: PMC3818464.
40. Thiennimitr P, Winter SE, Winter MG, Xavier MN, Tolstikov V, Huseby DL, et al. Intestinal inflammation allows Salmonella to use ethanolamine to compete with the microbiota. *Proc Natl Acad Sci U S A*. 2011;108(42):17480-5. doi: 10.1073/pnas.1107857108. PubMed PMID: 21969563; PubMed Central PMCID: PMC3198331.
41. Winter SE, Thiennimitr P, Winter MG, Butler BP, Huseby DL, Crawford RW, et al. Gut inflammation provides a respiratory electron acceptor for Salmonella. *Nature*. 2010;467(7314):426-9. doi: 10.1038/nature09415. PubMed PMID: 20864996; PubMed Central PMCID: PMC2946174.
42. Rauch I, Deets KA, Ji DX, von Moltke J, Tenthorey JL, Lee AY, et al. NAIP-NLRC4 Inflammasomes Coordinate Intestinal Epithelial Cell Expulsion with Eicosanoid and IL-18 Release via Activation of Caspase-1 and -8. *Immunity*. 2017;46(4):649-59. doi: 10.1016/j.immuni.2017.03.016. PubMed PMID: 28410991; PubMed Central PMCID: PMC5476318.
43. Williams JM, Duckworth CA, Burkitt MD, Watson AJ, Campbell BJ, Pritchard DM. Epithelial cell shedding and barrier function: a matter of life and death at the small intestinal villus tip. *Vet Pathol*. 2015;52(3):445-55. doi: 10.1177/0300985814559404. PubMed PMID: 25428410; PubMed Central PMCID: PMC4441880.
44. Knodler LA, Crowley SM, Sham HP, Yang H, Wrande M, Ma C, et al. Noncanonical inflammasome activation of caspase-4/caspase-11 mediates epithelial defenses against enteric bacterial pathogens. *Cell Host Microbe*. 2014;16(2):249-56. doi: 10.1016/j.chom.2014.07.002. PubMed PMID: 25121752; PubMed Central PMCID: PMC4157630.
45. Navabi N, Whitt J, Wu SE, Woo V, Moncivaiz J, Jordan MB, et al. Epithelial Histone Deacetylase 3 Instructs Intestinal Immunity by Coordinating Local Lymphocyte Activation. *Cell Rep*. 2017;19(6):1165-75. doi: 10.1016/j.celrep.2017.04.046. PubMed PMID: 28494866; PubMed Central PMCID: PMC5499685.
46. Chudnovskiy A, Mortha A, Kana V, Kennard A, Ramirez JD, Rahman A, et al. Host-Protozoan Interactions Protect from Mucosal Infections through Activation of the Inflammasome. *Cell*. 2016;167(2):444-56 e14. doi: 10.1016/j.cell.2016.08.076. PubMed PMID: 27716507; PubMed Central PMCID: PMC5129837.
47. Bono MR, Tejon G, Flores-Santibanez F, Fernandez D, Roseblatt M, Sauma D. Retinoic Acid as a Modulator of T Cell Immunity. *Nutrients*. 2016;8(6). doi: 10.3390/nu8060349. PubMed PMID: 27304965; PubMed Central PMCID: PMC4924190.
48. Tone M, Thompson SA, Tone Y, Fairchild PJ, Waldmann H. Regulation of IL-18 (IFN-gamma-inducing factor) gene expression. *J Immunol*. 1997;159(12):6156-63. PubMed PMID: 9550417.
49. Zhu Q, Kanneganti TD. Cutting Edge: Distinct Regulatory Mechanisms Control Proinflammatory Cytokines IL-18 and IL-1 $\beta$ . *J Immunol*. 2017;198(11):4210-5. doi: 10.4049/jimmunol.1700352. PubMed PMID: 28468974; PubMed Central PMCID: PMC5544497.
50. Kempster SL, Belteki G, Forhead AJ, Fowden AL, Catalano RD, Lam BY, et al. Developmental control of the Nlrp6 inflammasome and a substrate, IL-18, in mammalian intestine. *Am J Physiol Gastrointest Liver Physiol*. 2011;300(2):G253-63. doi: 10.1152/ajpgi.00397.2010. PubMed PMID: 21088234; PubMed Central PMCID: PMC3043648.
51. Lavee S, Anno YN, Chatagnon A, Samarut E, Poch O, Laudet V, et al. Genome-wide in silico identification of new conserved and functional retinoic acid receptor response elements (direct



- repeats separated by 5 bp). *J Biol Chem.* 2011;286(38):33322-34. doi: 10.1074/jbc.M111.263681. PubMed PMID: 21803772; PubMed Central PMCID: PMC3190930.
52. Delacroix L, Moutier E, Altobelli G, Legras S, Poch O, Choukrallah MA, et al. Cell-specific interaction of retinoic acid receptors with target genes in mouse embryonic fibroblasts and embryonic stem cells. *Mol Cell Biol.* 2010;30(1):231-44. doi: 10.1128/MCB.00756-09. PubMed PMID: 19884340; PubMed Central PMCID: PMC32798310.
53. Yasuda K, Nakanishi K, Tsutsui H. Interleukin-18 in Health and Disease. *Int J Mol Sci.* 2019;20(3). doi: 10.3390/ijms20030649. PubMed PMID: 30717382; PubMed Central PMCID: PMC6387150.
54. Takeda N, Arima M, Tsuruoka N, Okada S, Hatano M, Sakamoto A, et al. Bcl6 is a transcriptional repressor for the IL-18 gene. *J Immunol.* 2003;171(1):426-31. PubMed PMID: 12817026.
55. Kolla V, Lindner DJ, Xiao W, Borden EC, Kalvakolanu DV. Modulation of interferon (IFN)-inducible gene expression by retinoic acid. Up-regulation of STAT1 protein in IFN-unresponsive cells. *J Biol Chem.* 1996;271(18):10508-14. doi: 10.1074/jbc.271.18.10508. PubMed PMID: 8631848.
56. Kolla V, Weihua X, Kalvakolanu DV. Modulation of interferon action by retinoids. Induction of murine STAT1 gene expression by retinoic acid. *J Biol Chem.* 1997;272(15):9742-8. doi: 10.1074/jbc.272.15.9742. PubMed PMID: 9092506.
57. Takahashi H, Kanno T, Nakayama S, Hirahara K, Sciume G, Muljo SA, et al. TGF-beta and retinoic acid induce the microRNA miR-10a, which targets Bcl-6 and constrains the plasticity of helper T cells. *Nat Immunol.* 2012;13(6):587-95. doi: 10.1038/ni.2286. PubMed PMID: 22544395; PubMed Central PMCID: PMC3499969.
58. Alsaleh G, Suffert G, Semaan N, Juncker T, Frenzel L, Gottenberg JE, et al. Bruton's tyrosine kinase is involved in miR-346-related regulation of IL-18 release by lipopolysaccharide-activated rheumatoid fibroblast-like synoviocytes. *J Immunol.* 2009;182(8):5088-97. doi: 10.4049/jimmunol.0801613. PubMed PMID: 19342689.
59. Rohrer J, Parolini O, Belmont JW, Conley ME, Parolino O. The genomic structure of human BTK, the defective gene in X-linked agammaglobulinemia. *Immunogenetics.* 1994;40(5):319-24. PubMed PMID: 7927535.
60. Munoz M, Eidenschenk C, Ota N, Wong K, Lohmann U, Kuhl AA, et al. Interleukin-22 induces interleukin-18 expression from epithelial cells during intestinal infection. *Immunity.* 2015;42(2):321-31. doi: 10.1016/j.immuni.2015.01.011. PubMed PMID: 25680273.
61. Neighbors M, Xu X, Barrat FJ, Ruuls SR, Churakova T, Debets R, et al. A critical role for interleukin 18 in primary and memory effector responses to *Listeria monocytogenes* that extends beyond its effects on Interferon gamma production. *J Exp Med.* 2001;194(3):343-54. doi: 10.1084/jem.194.3.343. PubMed PMID: 11489953; PubMed Central PMCID: PMC2193467.
62. Nomura T, Kawamura I, Tsuchiya K, Kohda C, Baba H, Ito Y, et al. Essential role of interleukin-12 (IL-12) and IL-18 for gamma interferon production induced by listeriolysin O in mouse spleen cells. *Infect Immun.* 2002;70(3):1049-55. doi: 10.1128/iai.70.3.1049-1055.2002. PubMed PMID: 11854182; PubMed Central PMCID: PMC327750.
63. Kim M, Galan C, Hill AA, Wu WJ, Fehlner-Peach H, Song HW, et al. Critical Role for the Microbiota in CX3CR1(+) Intestinal Mononuclear Phagocyte Regulation of Intestinal T Cell Responses. *Immunity.* 2018;49(1):151-63 e5. doi: 10.1016/j.immuni.2018.05.009. PubMed PMID: 29980437; PubMed Central PMCID: PMC6051886.
64. Benjamin JL, Sumpter R, Jr., Levine B, Hooper LV. Intestinal epithelial autophagy is essential for host defense against invasive bacteria. *Cell Host Microbe.* 2013;13(6):723-34. doi: 10.1016/j.chom.2013.05.004. PubMed PMID: 23768496; PubMed Central PMCID: PMC3755484.

## Figure captions

### Fig 1. Epithelial-intrinsic RAR signaling is protective against *Salmonella* colonization

(A) Relative expression of RAR and RXR isoforms ( $\alpha$ ,  $\beta$  and  $\gamma$ ) in laser capture microdissected epithelial cells from homeostatic C57BL/6 mice ileal tissues (B) Schematic representation of the creation of  $\text{stop}^{\text{flox}}$  (wild type) and  $\text{stop}^{\Delta\text{IEC}}$  (RAR signaling knockdown) mice using Villin-Cre dependent expression of the dnRAR cassette. (C) Relative expression of vitamin A responsive gene, *isx*, in  $\text{stop}^{\text{flox}}$  and  $\text{stop}^{\Delta\text{IEC}}$  ileum tissues. (D) Schematic representation of *Salmonella* infection timeline with assessment of pathogen loads at 18 hours and 72 hours post infection (hpi). (E) Bacterial burden in fecal and proximal colon tissues at 18 hpi in  $\text{stop}^{\text{flox}}$  and  $\text{stop}^{\Delta\text{IEC}}$  mice. (F) Bacterial burden in fecal, distal colon and mesenteric lymph node samples at 72 hpi in  $\text{stop}^{\text{flox}}$  and  $\text{stop}^{\Delta\text{IEC}}$  mice. Representative data from 3 independent experiments.  $n=3-4$  mice per group. Student's t test was used for statistical analysis. \* $P<0.05$ ; \*\* $P<0.01$ .

### Fig 2. Epithelial-intrinsic RAR signaling promotes mucosal IFN $\gamma$ response during infection

(A-D) Flow cytometry analysis of colonic lamina propria lymphocytes from  $\text{stop}^{\text{flox}}$  and  $\text{stop}^{\Delta\text{IEC}}$  mice 72 hpi with *Salmonella*. Representative density plots and quantitative analysis of relative frequencies of (A) total live CD45 $^{+}$  IFN $\gamma^{+}$  cells (B) total CD4 $^{+}$  and CD8 $^{+}$  T cells (C) CD4 $^{+}$  IFN $\gamma^{+}$  cells and (D) CD8 $^{+}$  IFN $\gamma^{+}$  cells in  $\text{stop}^{\text{flox}}$  and  $\text{stop}^{\Delta\text{IEC}}$  mice. Representative data from 2 independent experiments.  $n=3-4$  mice per group. Student's t test was used for statistical analysis. \* $P<0.05$ ; \*\* $P<0.01$ . (E) Schematic representation of IFN $\gamma$  feedback in  $\text{stop}^{\Delta\text{IEC}}$  mice during *Salmonella* infection. Mice were intraperitoneally injected with 10  $\mu\text{g}$  of IFN $\gamma$  at 0 hpi and 48 hpi. (F) Bacterial burden in fecal and mesenteric lymph nodes at 72 hrs post *Salmonella* infection in  $\text{stop}^{\text{flox}}$ ,  $\text{stop}^{\Delta\text{IEC}}$  and  $\text{stop}^{\Delta\text{IEC}}$  + IFN $\gamma$  mice. One-way ANOVA was used for statistical analysis. \*\* $P<0.01$ , \*\*\* $P<0.005$ .

### **Fig 3. Intestinal epithelium-intrinsic RAR signaling regulates interleukin-18**

Representative western blots and quantitative image analysis results comparing homeostatic levels of IL-18 in colon whole tissue **(A)** and colonocyte **(B)** lysates from  $\text{stop}^{\text{flox}}$  and  $\text{stop}^{\Delta\text{IEC}}$  mice. Representative data from 2 independent experiments. **(C)** Representative western blot and quantitative image analysis comparing IL-18 levels in colonocytes from  $\text{stop}^{\text{flox}}$  mice fed regular mouse chow spiked with vehicle (corn oil) or retinyl acetate (500 IU/g) for 3 days. Representative data from 2 independent experiments. All quantitation analysis done for pro-IL18 levels in all experiments. ImageJ was used for densitometric analysis of image.  $\beta$  actin levels were used for normalization. Student's t test was used for statistical analysis. \* $P < 0.05$ ; \*\* $P < 0.01$ .

### **Fig 4. RAR signaling-dependent IL-18 orchestrates early resistance to *Salmonella* invasion**

**(A)** Schematic representation of IL-18 and IFN $\gamma$  feedback regimen for 18 hour time point in *Salmonella* infection. **(B)** Fecal and **(C)** Colon bacterial loads at 18hpi in  $\text{stop}^{\text{flox}}$ ,  $\text{stop}^{\Delta\text{IEC}}$ ,  $\text{stop}^{\Delta\text{IEC}}$  + IL-18 and  $\text{stop}^{\Delta\text{IEC}}$  + IFN $\gamma$  mice. Combined data from 2 independent experiments **(D, E and F)** Representative confocal microscopy images depicting loads of *Salmonella* (red) in colon tissue 18 hrs post infection, counterstained with EpCAM (epithelial cells; green) and DAPI (nuclei; grey). **(G, H and I)** Representative images and **(J)** quantitative analysis of epithelial cell death (cleaved caspase-3 positive cells; red) in cecal tissues of  $\text{stop}^{\text{flox}}$ ,  $\text{stop}^{\Delta\text{IEC}}$  and  $\text{stop}^{\Delta\text{IEC}}$  + IL-18 mice at 18 hours post infection. Samples counterstained with Epcam (epithelial cells; green) and DAPI (nuclei; grey). Combined data from 2 independent experiments. Quantitative comparison was made by counting total Csp3+ve cells per image. Data is an average of 6-10 images per mouse with 3-4 mice per group per experiment. One-way ANOVA was used for statistical analysis. \* $P < 0.05$ ; \*\* $P < 0.01$ , \*\*\* $P < 0.005$ .

### **Fig 5. Intestinal epithelium-intrinsic RAR signaling regulates pathogen colonization via interleukin-18**

(A) Schematic representation of IL-18 feedback regimen in stop<sup>ΔIEC</sup> mice during *Salmonella* infection at 72 hpi. Bacterial burden in fecal (B), mesenteric lymph nodes (C) and colon (D) at 72 hpi in stop<sup>flox</sup>, stop<sup>ΔIEC</sup> and stop<sup>ΔIEC</sup> + IL-18 mice. Combined data from 2 independent experiments. (E) Flow cytometry analysis of colonic lamina propria lymphocytes from stop<sup>flox</sup>, stop<sup>ΔIEC</sup> and stop<sup>ΔIEC</sup> + IL-18 mice with density plots and quantitative analysis of relative frequencies of CD3+IFNγ+ cells. Representative data from 2 independent experiments. n=3-4 mice per group. One-way ANOVA was used for statistical analysis. \*P<0.05; \*\*P<0.01, \*\*\*P<0.005.

## Fig 6. Model depicting role of epithelial-intrinsic signaling during *Salmonella* infection

Dietary vitamin A activates retinoic acid signaling within colonic epithelial cells to induce production of IL-18 at homeostasis. During early stages of *Salmonella* infection (18 hours), IL-18 promotes epithelial cell shedding to eliminate infected cells and restrict pathogen invasion. IL-18 also primes IFNγ production by mucosal T cells which promote pathogen clearance during later stages of the infection (72 hours).

## Supporting information

**S1 Fig. Mucus thickness and epithelial turnover analysis.** This figure compares the (A) mucus thickness, (B) goblet cells/crypt and (C and D) epithelial turnover via BrdU incorporation at 2 h (C) and 25 h (D) post injection in homeostatic colons of stop<sup>flox</sup> and stop<sup>ΔIEC</sup> mice.

**S2 Fig. Homeostatic colon lamina propria lymphocyte characterization** This figure describes the relative frequencies of (A) CD45+CD3+ cells, (B) CD45+CD3+ IFNγ+ cells, (C) CD45+CD3+IL17+ cells and (D) IL22+ cells in the colons of stop<sup>flox</sup> and stop<sup>ΔIEC</sup> mice at homeostasis.



**S3 Fig. Colon lamina propria lymphocyte characterization during infection** This figure describes the relative frequencies of (A) CD3<sup>+</sup> IL17<sup>+</sup> and (B) CD45<sup>+</sup>IL22<sup>+</sup> cells in colonic lamina propria of stop<sup>flox</sup> and stop<sup>ΔIEC</sup> mice 72 hours post *Salmonella* infection.

**S1 Movie. Intracellular *Salmonella* burden in stop<sup>flox</sup> mice** Video of Z stacks imaging for intracellular loads of *Salmonella* in proximal colon tissues of stop<sup>flox</sup> mice at 18 hours post infection.

**S2 Movie. Intracellular *Salmonella* burden in stop<sup>ΔIEC</sup> mice** Video of Z stacks imaging for intracellular loads of *Salmonella* in proximal colon tissues of stop<sup>ΔIEC</sup> mice at 18 hours post infection.

**S3 Movie. Intracellular *Salmonella* burden in stop<sup>ΔIEC</sup> + IL-18 mice** Video of Z stacks imaging for intracellular loads of *Salmonella* in proximal colon tissues of stop<sup>ΔIEC</sup> + IL-18 mice at 18 hours post infection.

**Fig 1**

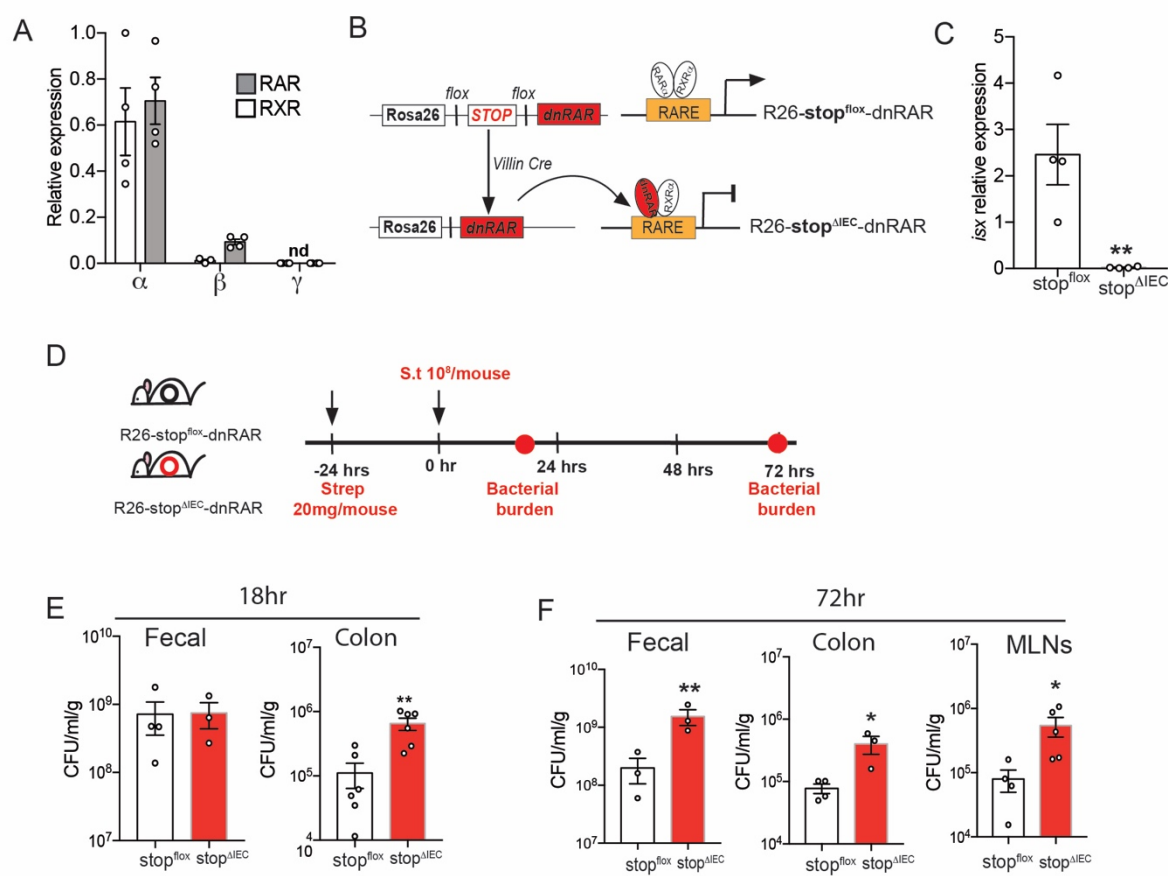

708 **Fig 2**

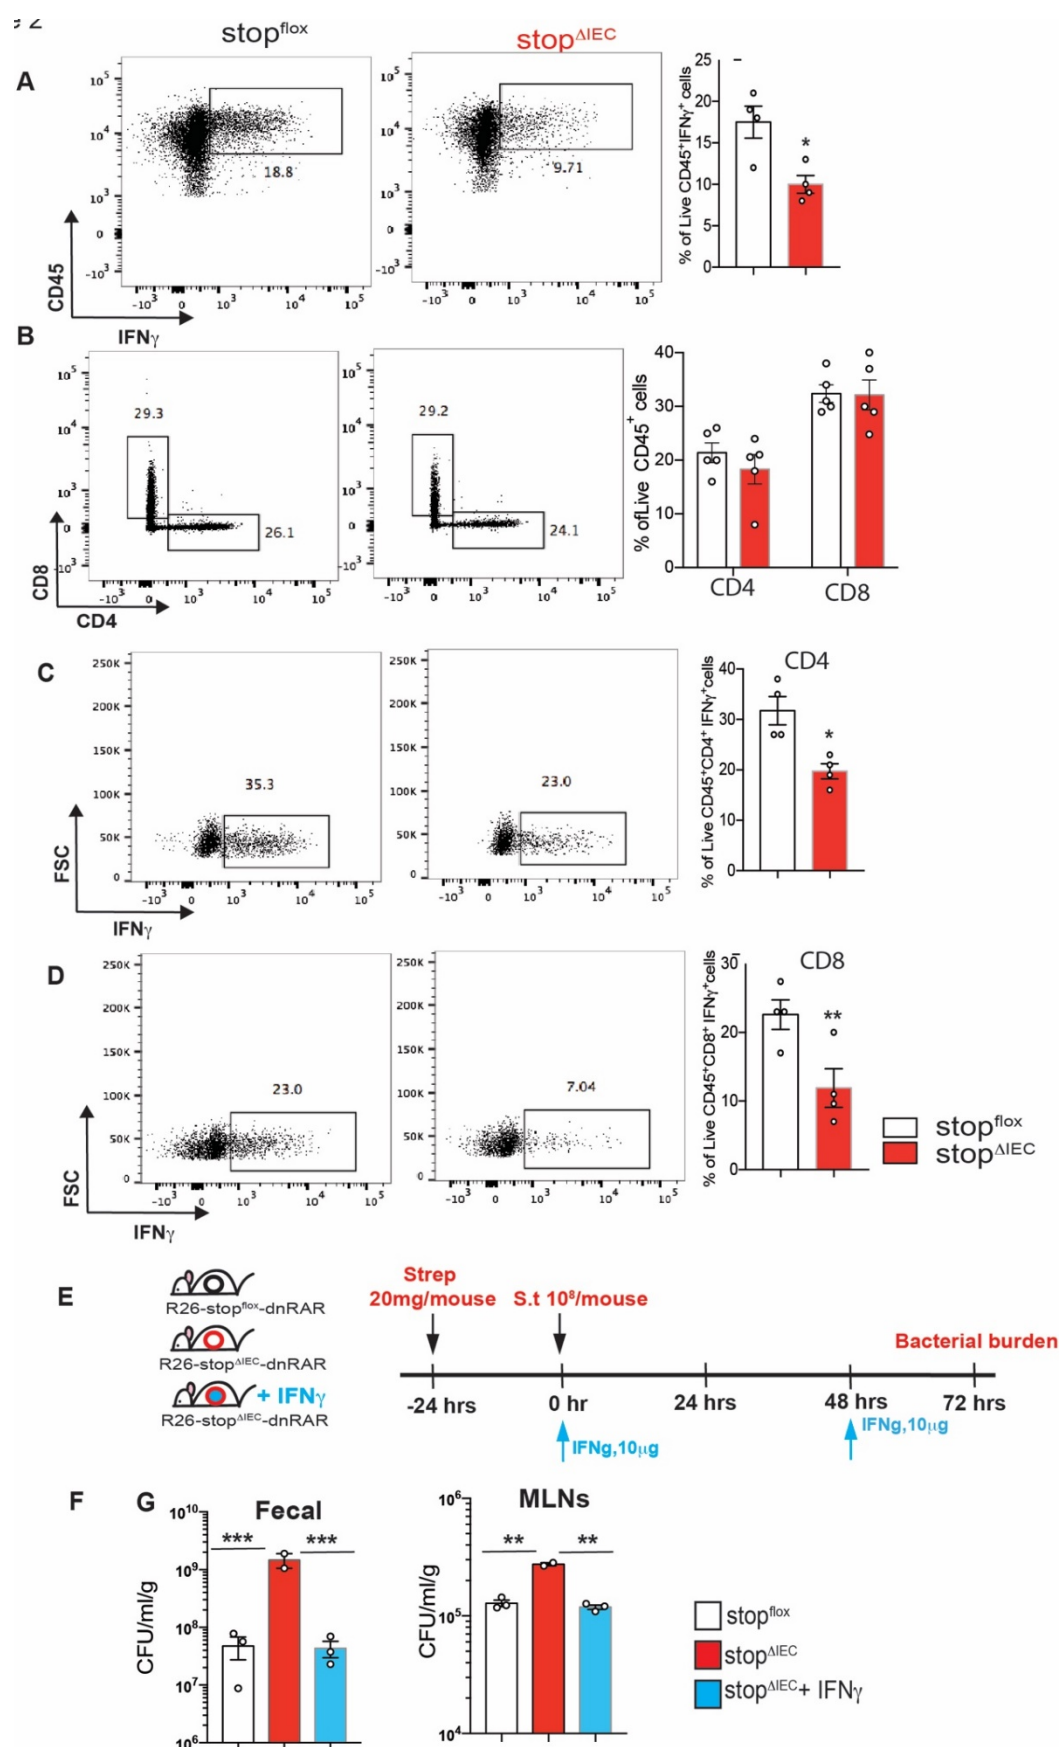

709

**Fig 3**

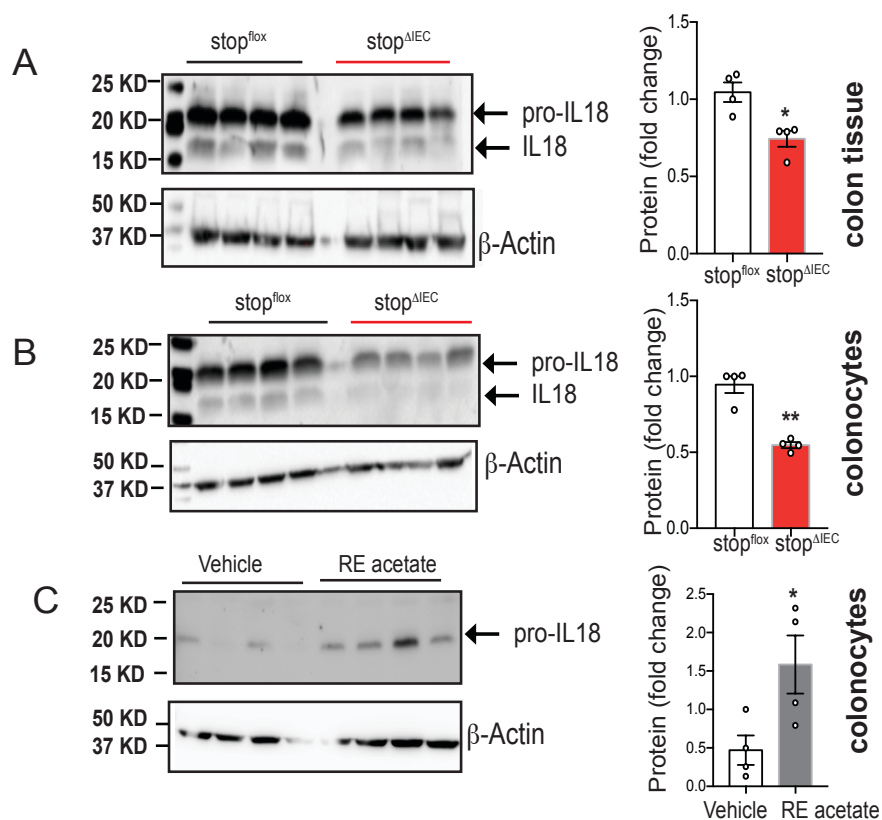

714 **Fig 4**

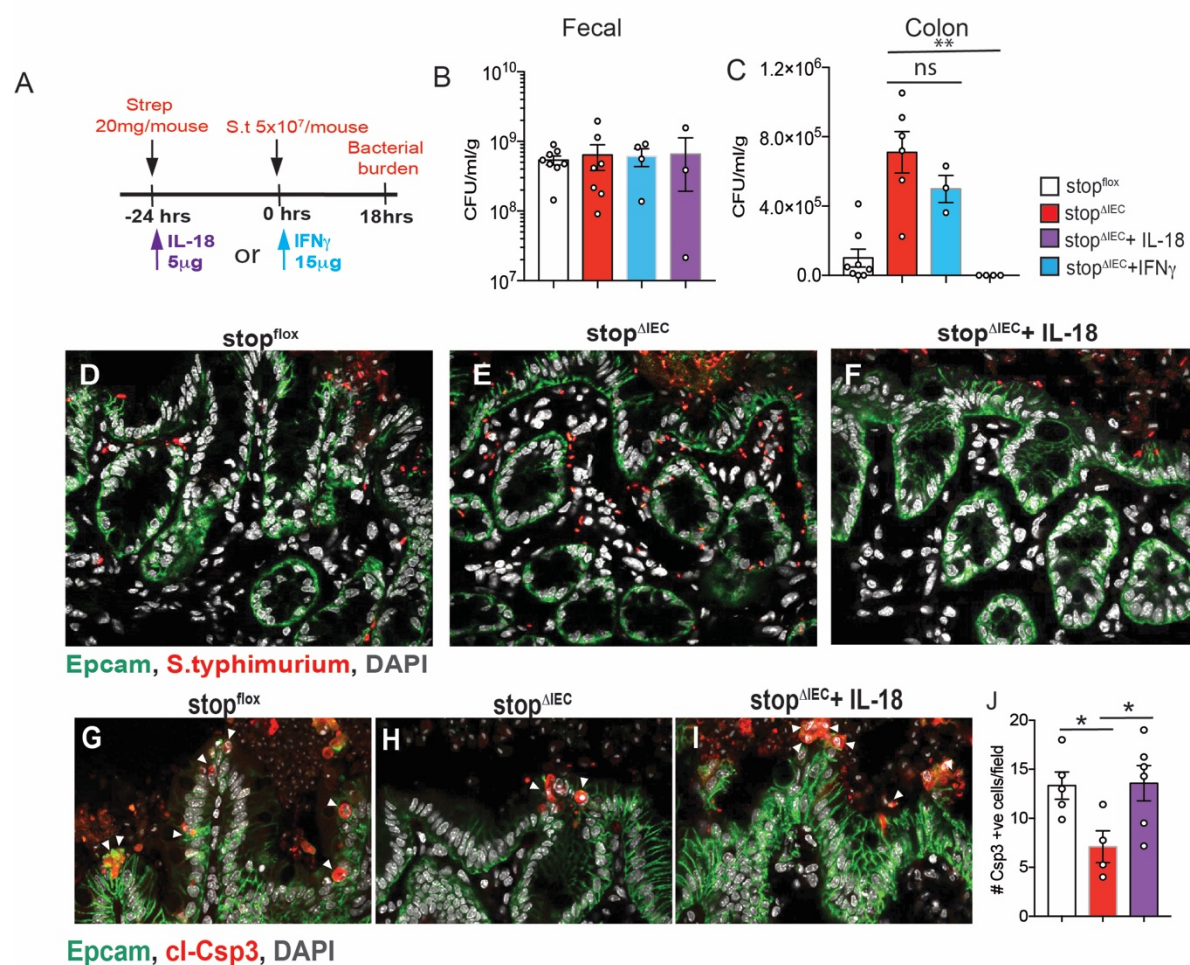

715

**Fig 5**

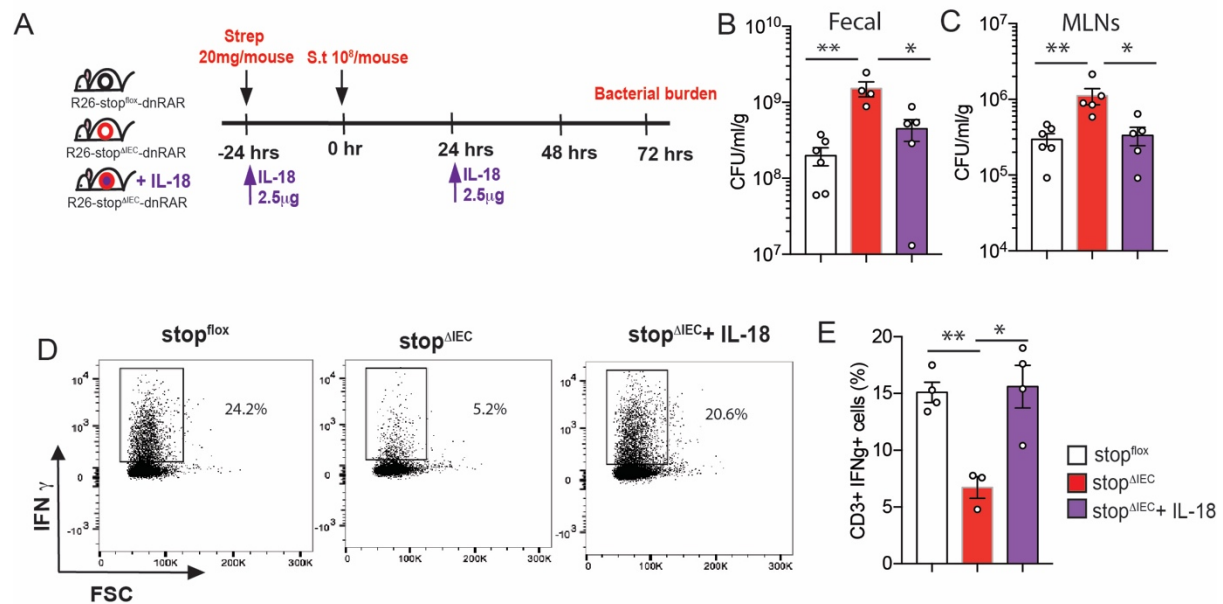

**Fig 6**

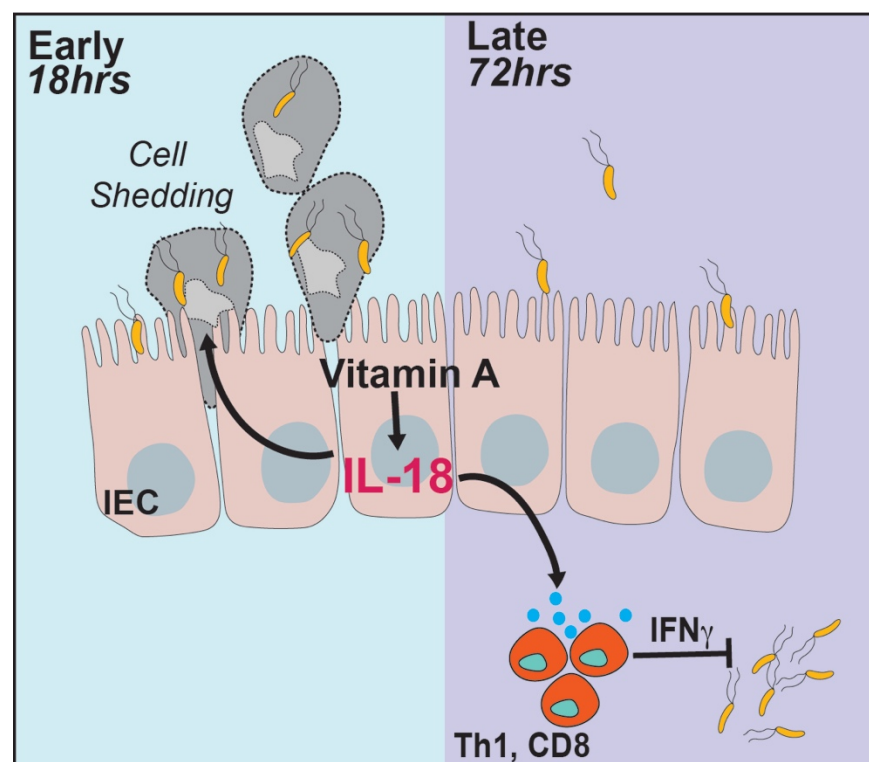

Source: https://www.biorxiv.org/content/10.1101/667998v1.full.pdf
